# Supplementary material
Source: publisher figshare collection journal article supplement (https://gsajournals.figshare.com/ndownloader/files/28965252)
Supplement: Supplementary file 1 [file 28965252]

**Table S2. Primers used in this study.**

| Name | Sequence | Purpose |
| --- | --- | --- |
| cas9_cdc13-1_F | TTTATACTGGCGAATTGAGGGTTTT | gRNA for *cdc13-1* |
| cas9_cdc13-1_R | CCTCAATTCGCCAGTATAAAGATCA | gRNA for *cdc13-1* |
| 80mer_cas9_cdc13-1 | AGGTTAGAGGGCAAAATTGTTGGCATGAATTCACCTCAATTCGCCAGTATAAATGAGTTCAAATATTGCACATTGAAATT | Template for *cdc13-1* via CRISPR |
| KSG163F | CATGGGAGAGGAAATGCATG | Amplify *cdc13-1* mutation for sequencing |
| KSG159R | CCCACAGGATCCTTTCAACTTC | Amplify *cdc13-1* mutation for sequencing |
| KSG175_cdc13-2_gRNA_R | GCTGCGAGTTGAATTCGTTTGTTTT | gRNA for *cdc13-2* |
| KSG176_cdc13-2_gRNA_F | AAACGAATTCAACTCGCAGCGATCA | gRNA for *cdc13-2* |
| KSG181_80mer_cdc13-2_CRISPR | CAAATAGACTAGGGATACCTTACATTGAATCCCTAAACAAATTCAACTCGCAGCTTATGACGCTTAATGTAGATGAACCG | Template for *cdc13-2* via CRISPR |
| KSG185_F | ATGAGGATCCTGCAGATATCCATCACACTGGC | BamHI site. To amplify GAA repeats from pYES3 to clone into pYES6 |
| KSG186_R | ACGATCTAGATAGTAGGTTGAGGCCGTTGAGC | XbaI site. To amplify GAA repeats from pYES3 to clone into pYES6 |
| pYES-Hybr_regionCHF | GGATCGGACTACTAGCAGCTG | Oligo hybridizing to Gal promoter used to probe 2D gels |
| Tcyc1_CHF | GGAGGGCGTGAATGTAAGCGTG | 2D gels |
| KSG193_F | TATTACCCGGGTATCTGCAGATATCCATCACACTGGC | XmaI site. For cloning GAA repeats into DDRA construct |
| KSG194_R | TATCACTAGTTACTAGTAGGTTGAGGCCGTTGAGC | SpeI site. For cloning GAA repeats into DDRA construct |
| RM282_ URA3_ChrVnoness_int_F | AAACAAACAAGGCCGCAACAATAACATCATCTAAAGACTTCCTTTGTGACCCGGAGATCTAGCTTTTCAATTCAATTC | Amplifies UR-GAA100-A3 along with TRP1 with flanking homology to Chr.V |
| RM283_ URA3_ChrVnoness_int_R | TCTGTATCTATACTCAACGTTACTTTCTGGCCATACCATAAGTTCTACACCCGGCGATAAGCTAGCAGGCAA | Amplifies UR-GAA100-A3 along with TRP1 with flanking homology to Chr.V |
| RM144_RAD51_Hyg_Int_F   |  | ATGTTGGAAATGCACCACTACCGTTCTTCAACCAATCTAGTTTAGCTATTTAGAACGCGGCTACAATTA | | --- | --- | |  | AAAGAGGAGAATTGAAAGTAAACCTGTGTAAATAAATAGAGACAAGAGACCAAATACCTACCCTGATTCTGTGGATAACC | | AAATGTTGGAAATGCACCACTACCGTTCTTCAACCAATCTAGTTTAGCTATTTAGAACGCGGCTACAATTA | KO of Rad51 |
| RM145_RAD51_Hyg_Int_R | AAAGAGGAGAATTGAAAGTAAACCTGTGTAAATAAATAGAGACAAGAGACCAAATACCTACCCTGATTCTGTGGATAACC | KO of Rad51 |
| Rad52_KO_F | TGTATCATCTGCTTGCCCTGTAATGTCCTTTCGTCTTCTCAATCACACTTACTCATCGCCCAGCTGAAGCTTCGTACGC | KO of Rad52 |
| Rad52_KO_R | ACTCAAACGTAGTTTTCTCTTCTCAAACTTAATGATCTATTGTTTTTCCGAGTTGCCCATAGGCCACTAGTGGATCTG | KO of Rad52 |
| TOF1/SP | GTAAGTCCTCACATATGATAATACCATCTAGCTTGTGGGGTTTAGTGTATCTTCAGCTGAAGCTTCGTACGC | KO of Tof1 |
| TOF1/ASP | TCTGTAGCTCTTATGCTTTCAATACTTGGTATGGATCCACCAAACAAGCTCGTATCATAGGCCACTAGTGGATCTG | KO of Tof1 |
| RM189_ MEC1_pAG_R | AGAGATGATTAATGAAGACAAAGTGAGGCTGGACAACAAGAACGACATACTTCGGTGATGACGGTGAAA | KO of Mec1 |
| RM190_MEC1_pAG_R | GGTCCATGTTTCTATCGTACATAATTGTTTCGATCACATTCATCAACGCTAAACCGTATTACCGCCTTTG | KO of Mec1 |
| sml1_nat_KO_fwd | TGGGAAGTCATCCGTCCCAAAAAGGAAATAGCCATAACATATCGTTACTGTTTTGGAACATCGCCCCGGGTTAATTAAGGCG | KO of Sml1 |
| sml1_nat_KO_Rev | GCTAGCGATATCTAGCTGTATCAAACGTATTATAGACTATCTTTGATAAAGACACAGAAATACAGCGCCCAATACGCAAACCG | KO of Sml1 |
| Rad53_pRCC_F | AACTACTGGGAAAACATTCGGTTTTAGAGCTAGAAATAGCAAGTTAAAATAAGG | Introduction of rad53-K227A mutation via CRISPR |
| Rad53_pRCC_R | CGAATGTTTTCCCAGTAGTTTCCGATCATTTATCTTTCACTGCGGAG | rad53-K227A mutation |
| Rad53_repairtemp_F | TTGCCACAGTAAAGAAAGCCATTGAAAGAACTACTGGGAAAACATTCGCCGTGGCGATTATAAGTAAACGCAAAGTAATAGGCAATATGGATGGTGTGAC | rad53-K227A mutation |
| Rad53_repairtemp_R | GTCACACCATCCATATTGCCTATTACTTTGCGTTTACTTATAATCGCCACGGCGAATGTTTTCCCAGTAGTTCTTTCAATGGCTTTCTTTACTGTGGCAA | rad53-K227A mutation |
| KSG164_Exo1KO_F | CTTTTTTTTCTTACGCGTCTTTAGCAAAGGCGGGAAGTACAATAACTAGTTTTGTGCACAACCCCGGGTTAATTAAGGCG | KO of Exo1 |
| KSG165_Exo1KO_Rev | GTCCTCACATGCGGCGTGCATTGTTCATAGCGGGGCAAACATACTTGTGGCTTAATTTGACGAGCGCCCAATACGCAAAC | KO of Exo1 |
| Hygr_to_Rad9_allF | TTTCTTATTACTGGCACGGCTTTGAATTTTCAGAGTGCAGTTCTGATTAAACACGCGAGGCAGCTGAAGCTTCGTACGC | KO for Rad9 |
| Hygr_to_Rad9_allR | ATCTCACCCATTGGGGTGAATCTCGTTATTGCTCCTTATTTTGGTCCATTTTATATTAAATCCCATAGGCCACTAGTGGATCTG | KO for Rad9 |
| JK219_POL32_SP | ATAATATTTCACATTAACTAACAACCAGAAATAGGCTTTAGTTAACTCAATCGGTAATTACAGCTGAAGCTTCGTACGC | KO for Pol32 |
| JK220_POL32_ASP | CATTTGTATTATACATTACATCACAATTAGTAATGGAAAGTGTTTGGAAAAAAAAGAAGACATAGGCCACTAGTGGATCTG | KO for Pol32 |
| RM94_RAD5del-Hyg-F | CCTTACTGCTAAGCGCATTGCTCACTTGAAAGTAAATTATCTACAAAGTTACACATACGATTTAGGTGAC | KO for Rad5 |
| RM95_RAD5del-Hyg-R | TCTATGCTATCTTGTATGATAAATCTCATAACTTTGACGCTGTTTGTCTGTCTGTGGATAACCGTATTAC | KO for Rad5 |
| A2 | CTCGATGTGCAGAACCTGAAGCTTGATCT | Check for GAA100 tract length |
| B2 | GCTCGAGTGCAGACCTCAAATTCGATGA | Check for GAA100 tract length |
